# Supplementary material for: Arab hut [c1905, Algeria]
Source: Royal Society of Chemistry journal article supplement (doi:10.1039/d2ra05519h), 1905-01-01
Supplement: d2ra05519h1.pdf [file d2ra05519h1.pdf]

## A highly active Z-scheme SnS/Zn<sub>2</sub>SnO<sub>4</sub> photocatalyst fabricated for methylene blue degradation

Yingjing Wang, Fen Xu\*, Lixian Sun\*, Yaying Li, Lumin Liao, Yanxun Guan, Jianhao Lao, Yukai Yang, Tianhao Zhou, Yu Wang, Bin Li, Kexiang Zhang, Yongjin Zou

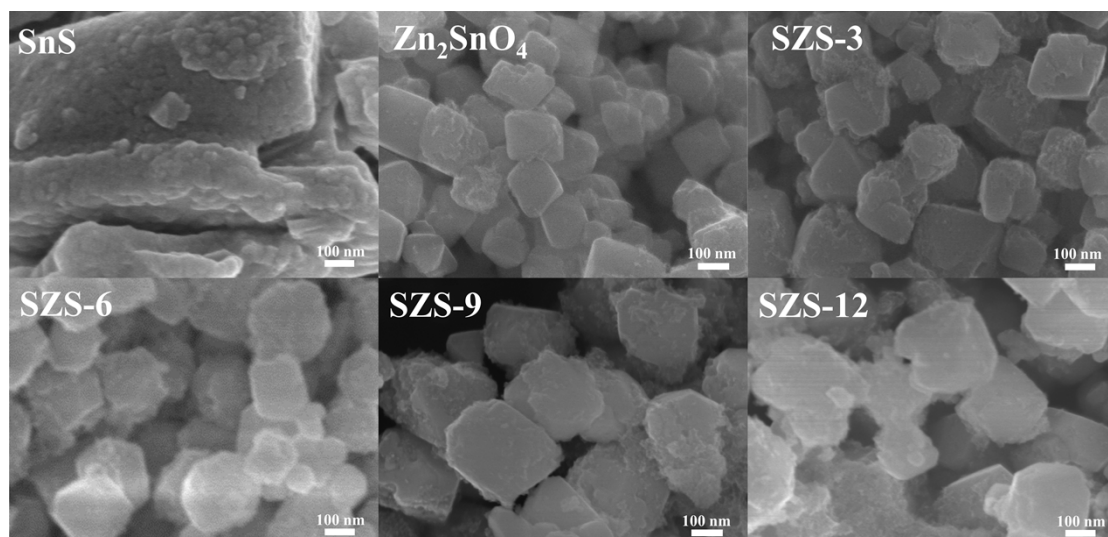

Fig.S1 SEM images of SnS, Zn<sub>2</sub>SnO<sub>4</sub>, SZS-x.

Guangxi Key Laboratory of Information Materials & Guangxi Collaborative Innovation Center for Structure and Properties for New Energy and Materials; School of Material Science and Engineering, Guilin University of Electronic Technology, Guilin 541004, P. R. China

\* Corresponding authors:

E-mail: xufen@guet.edu.cn (F. Xu); sunlx@guet.edu.cn (L.X. Sun)

Electronic Supplementary Information (ESI) available: [details of any supplementary information available should be included here]. See DOI: 10.1039/x0xx00000x

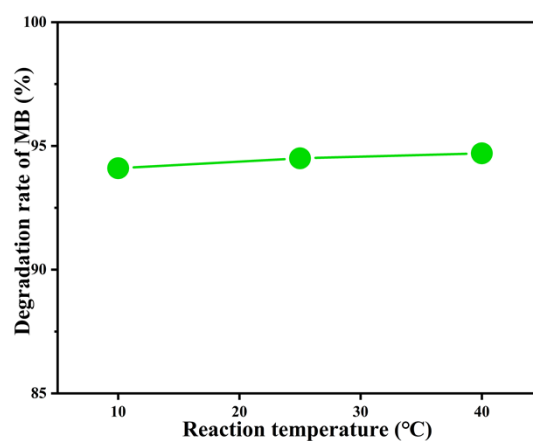

Fig.S2 Photocatalytic degradation rate of MB (10 mg/L) by 0.05 g SZS-6 at different temperatures.

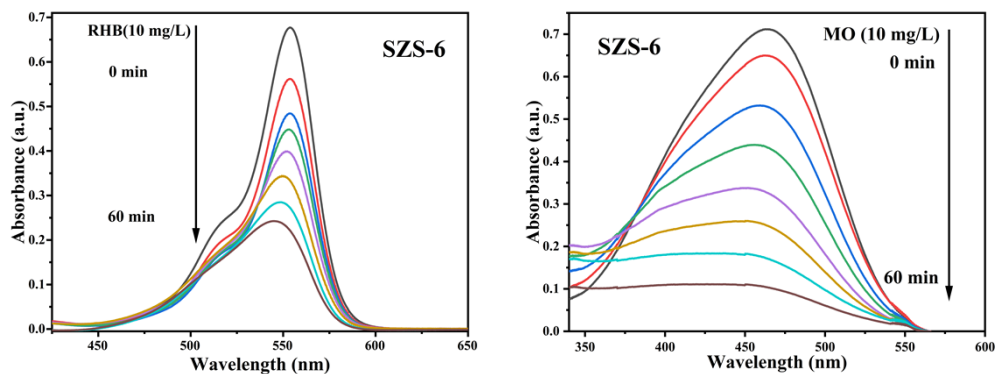

Fig.S3 The UV-vis absorption curves of RHB and MO by SZS-6 catalysis under visible light irradiation.

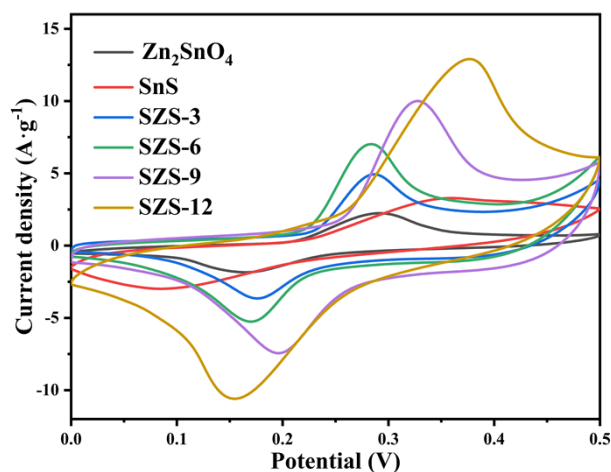

Fig. S4 Curves of cyclic voltammetry for  $Zn_2SnO_4$ , SnS and SZS-x.

Table S1

BET surface area, average pore size and pore volume of  $Zn_2SnO_4$  and SZS-x.

| Sample      | Pore volume<br>( $cm^3 \cdot g^{-1}$ ) | Pore diameter<br>(nm) | BET surface area<br>( $m^2 \cdot g^{-1}$ ) |
|-------------|----------------------------------------|-----------------------|--------------------------------------------|
| $Zn_2SnO_4$ | 0.207139                               | 15.4622               | 44.4447                                    |
| SZS-3       | 0.026454                               | 19.0930               | 5.0328                                     |
| SZS-6       | 0.023729                               | 21.8222               | 4.4387                                     |
| SZS-9       | 0.039919                               | 20.1118               | 6.6840                                     |
| SZS-12      | 0.017606                               | 15.0750               | 4.2618                                     |

### The evaluation of energy efficiency factors <sup>S1, S2</sup>

In order to assess the energy efficiency factor in the photocatalytic process under study, the electrical energy per order (EE/O) and the average apparent quantum yield ( $\phi_{app,av}$ ) should be calculated.

EE/O is calculated by the following equation:

$$EE / O = \frac{P \frac{t}{60} \cdot 3785}{V \log(C_{in} / C)} \quad (1)$$

where EE/O is defined as the kilowatt-hours of electricity required to reduce the concentration of a compound in 1000 gallons of water by one order of magnitude, P represents the lamp-emitted power in kW,  $t$  is the irradiation time in min, V is the total reactor volume,  $C_{in}$  the initial model pollutant concentration and  $C$  is the model pollutant concentration at time  $t$ .

The average apparent quantum efficiency ( $\phi_{app,av}$ ) is calculated by the following equation:

$$\phi_{app,av} = \frac{\left(\frac{N_{90\%}}{t_{90\%}}\right)}{\int_{\lambda_1}^{\lambda_2} \frac{R \cdot A_{irr} \cdot \lambda d\lambda}{hc}} \quad (2)$$

where  $\phi_{app,av}$  is the ratio of the number of electrons involved in the reaction to the total number of absorbed photons in the system,  $N_{90\%}$  being the number of pollutant molecules degraded at the 90% conversion level,  $t_{90\%}$  the time required to achieve 90% conversion in seconds, R is the radiation intensity in  $W (m^2 \cdot nm)^{-1}$ ,  $A_{irr}$  the irradiated catalyst area in  $m^2$ , h is the Plank's constant ( $6.62 \cdot 10^{-34}$  J.s), c is the speed of light in vacuum ( $2.997 \cdot 10^8$  m/s).

The gibbs free energy of activation  $\Delta G_{\neq}^{\theta}$  is calculated by the following equation:

$$V G_{\neq}^{\theta} = RT \ln \left[ \frac{RT}{N_A h k} \right]$$

where  $\Delta G_{\neq}^{\theta}$  is the change in the standard Gibbs energy of the reactants during the formation of the activated complex, R is the molar gas constant, T is reaction temperature,  $N_A$  is Avogadro constant, h is the Plank's constant ( $6.62 \cdot 10^{-34}$  J.s),  $k$  is the reaction rate constant.

With smaller values of the EE/O, less energy is required for decreasing the concentration of model pollutants in the photocatalytic system. The higher the average apparent quantum yield indicates that the more electrons are involved in the photocatalytic system, the more advantageous it is for photocatalytic reactions.

## Reference

- S1. A. n. O. z. Benito Serrano, Jesu' s Moreira, and Hugo I. de Lasa, *Ind. Eng. Chem. Res.*, 2010, **49**, 6824-6833.  
 S2. B. S. M. S. Hugo de Lasa, *Photocatalytic Reaction Engineering*, 2005, 119-131.

Table S2

The electrical energy per order (EE/O) and the average apparent quantum yield ( $\phi_{app,av}$ ) of samples.

| Sample                           | EE/O<br>( $\times 10^4$ kW-h/L) | $\phi_{app,av}$<br>% |
|----------------------------------|---------------------------------|----------------------|
| Zn <sub>2</sub> SnO <sub>4</sub> | 9.7                             | 20.9                 |
| SnS                              | 8.8                             | 21.2                 |
| SZS-3                            | 3.5                             | 37.4                 |
| SZS-6                            | 1.4                             | 57.3                 |
| SZS-9                            | 4.0                             | 35.9                 |
| SZS-12                           | 6.4                             | 27.5                 |

Table S3

Adsorption rate of samples

| Sample                           | Adsorption rate % |
|----------------------------------|-------------------|
| Zn <sub>2</sub> SnO <sub>4</sub> | 8.7               |
| SnS                              | 6.6               |
| SZS-3                            | 16.8              |
| SZS-6                            | 15.6              |
| SZS-9                            | 14.6              |
| SZS-12                           | 15.5              |
